# Supplementary material for: Efficient Synthesis of Novel Pyridine-Based Derivatives via Suzuki Cross-Coupling Reaction of Commercially Available 5-Bromo-2-methylpyridin-3-amine: Quantum Mechanical Investigations and Biological Activities
Source: MDPI journal article supplement (doi:10.3390/molecules22020190), 2017-01-27
Supplement: s1 [file s1]

# Supplementary Materials: Efficient Synthesis of Novel Pyridine-Based Derivatives via Suzuki Cross-Coupling Reaction of Commercially Available 5-Bromo-2-methylpyridin-3-amine: Quantum Mechanical Investigations and Biological Activities

Gulraiz Ahmad, Nasir Rasool, Hafiz Mansoor Ikram, Samreen Gul Khan, Tariq Mahmood, Khurshid Ayub, Muhammad Zubair, Eman Al-Zahrani, Usman Ali Rana, Muhammad Nadeem Akhtar and Noorjahan Banu Alitheen

| S. No. | HOMO                                                                                | LUMO                                                                                | S. No. | HOMO                                                                                 | LUMO                                                                                  |
|--------|-------------------------------------------------------------------------------------|-------------------------------------------------------------------------------------|--------|--------------------------------------------------------------------------------------|---------------------------------------------------------------------------------------|
| 2a     | 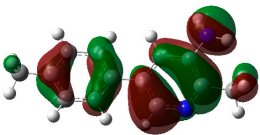  |   | 4a     |   |   |
| 2b     |  |  | 4b     |  |  |
| 2c     |  |  | 4c     |  |  |
| 2d     |  |  | 4d     |  |  |

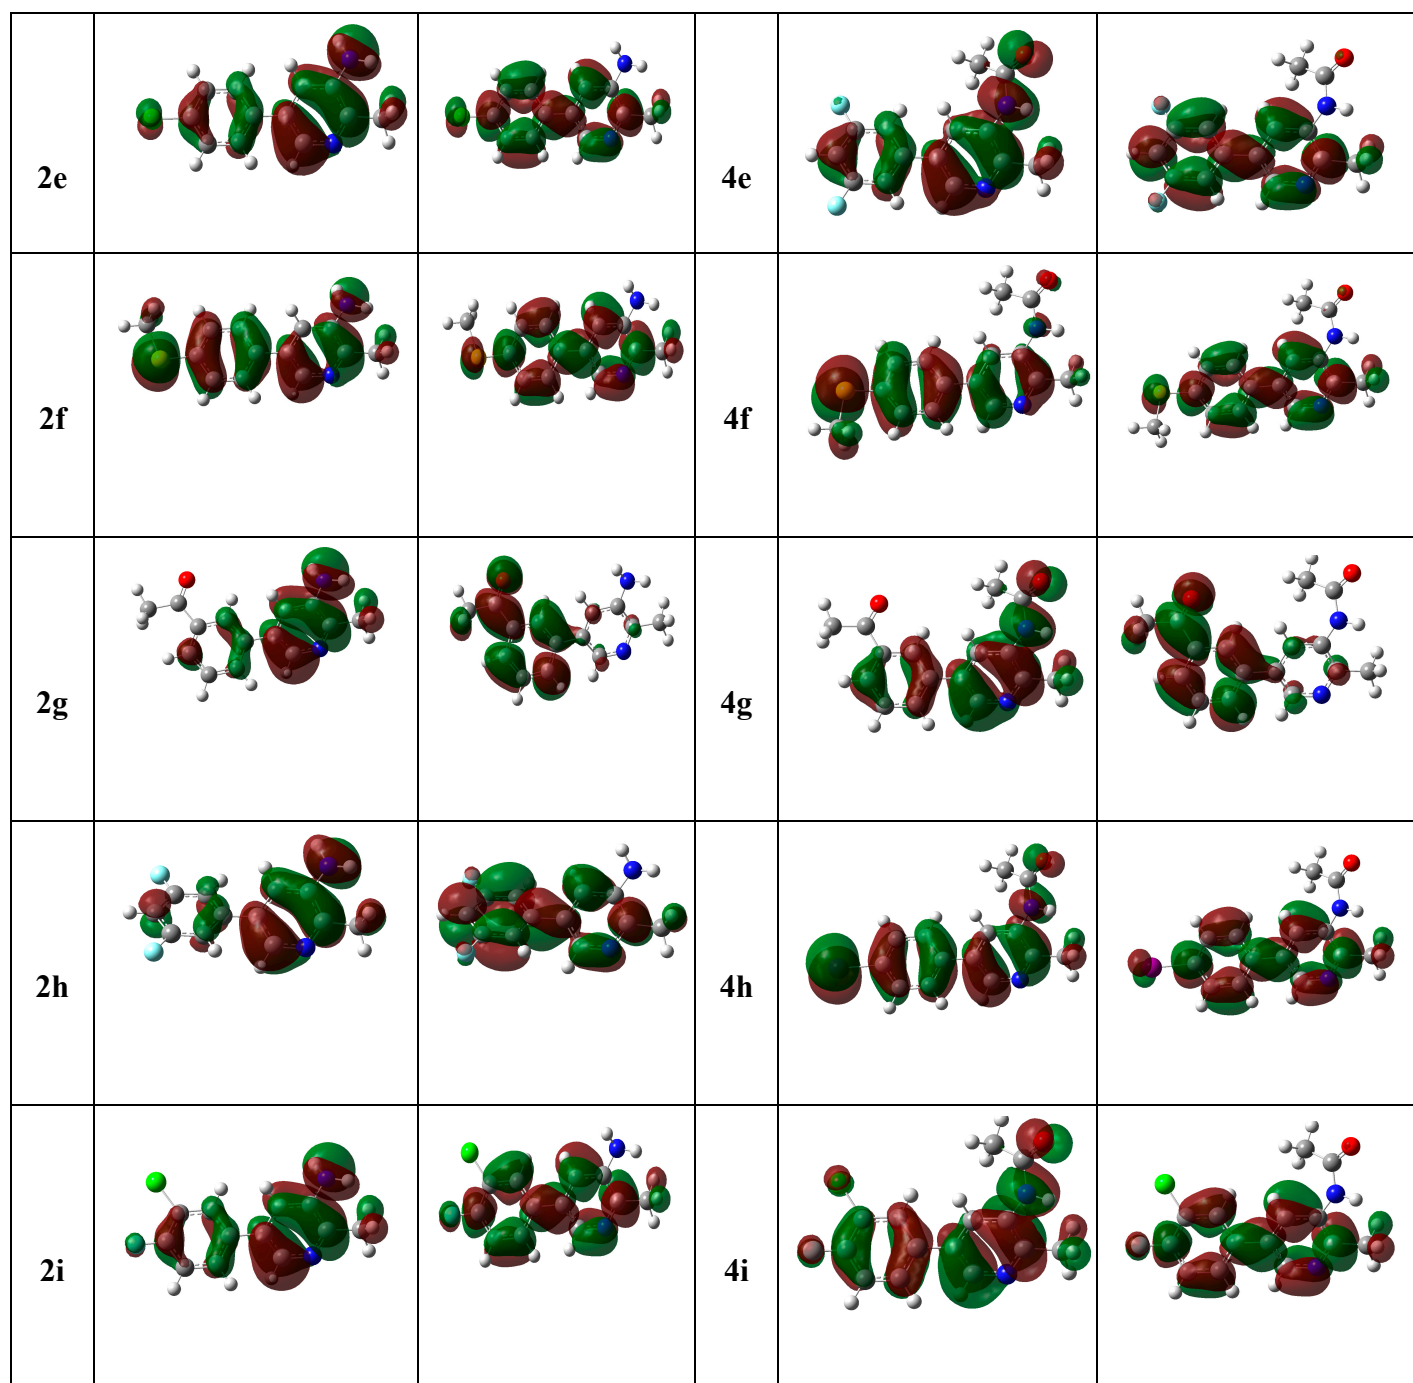

Figure S1. FMOs surfaces of 2a-i and 4a-i.
